# Supplementary material
Source: PubMed Central journal article supplement (PMC4071168)

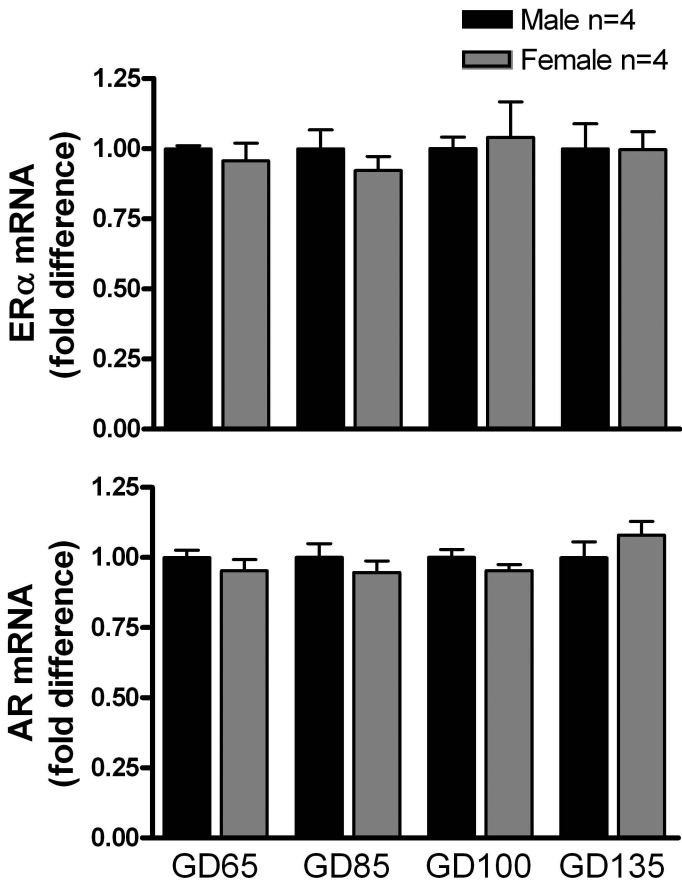

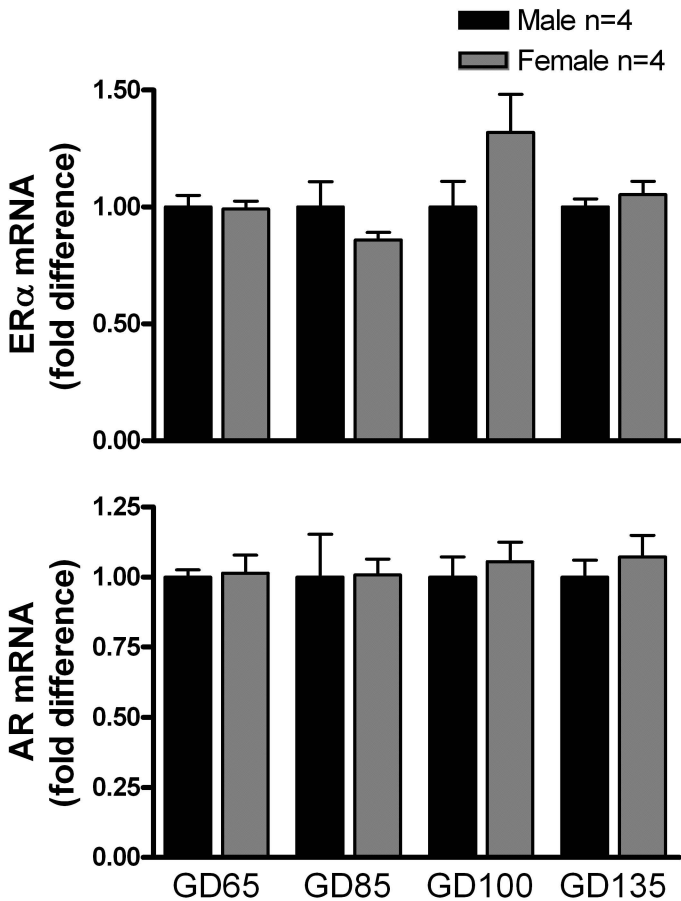

Supplement: NIHMS576737-supplement-Supp_FigureS1-S2.pdf [file NIHMS576737-supplement-Supp_FigureS1-S2.pdf]
